# Supplementary material for: Distribution of ADAT-Dependent Codons in the Human Transcriptome
Source: PubMed Central journal article supplement (PMC4581194; doi:10.3390/ijms160817303), 2015-07-29
Supplement: ijms-16-17303-s001.pdf [file ijms-16-17303-s001.pdf]

# Supplementary Information

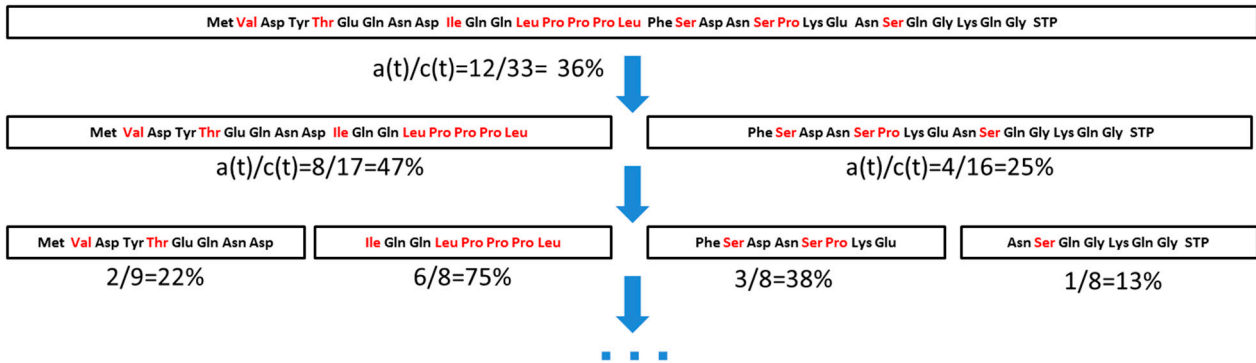

**Figure S1.** *Halves-gene* method layout. Each sequence is divided into halves recursively (blue arrows) until the regions are small enough. For each region  $a(t)/c(t)$  is calculated. Red amino acids correspond to *A* codons.

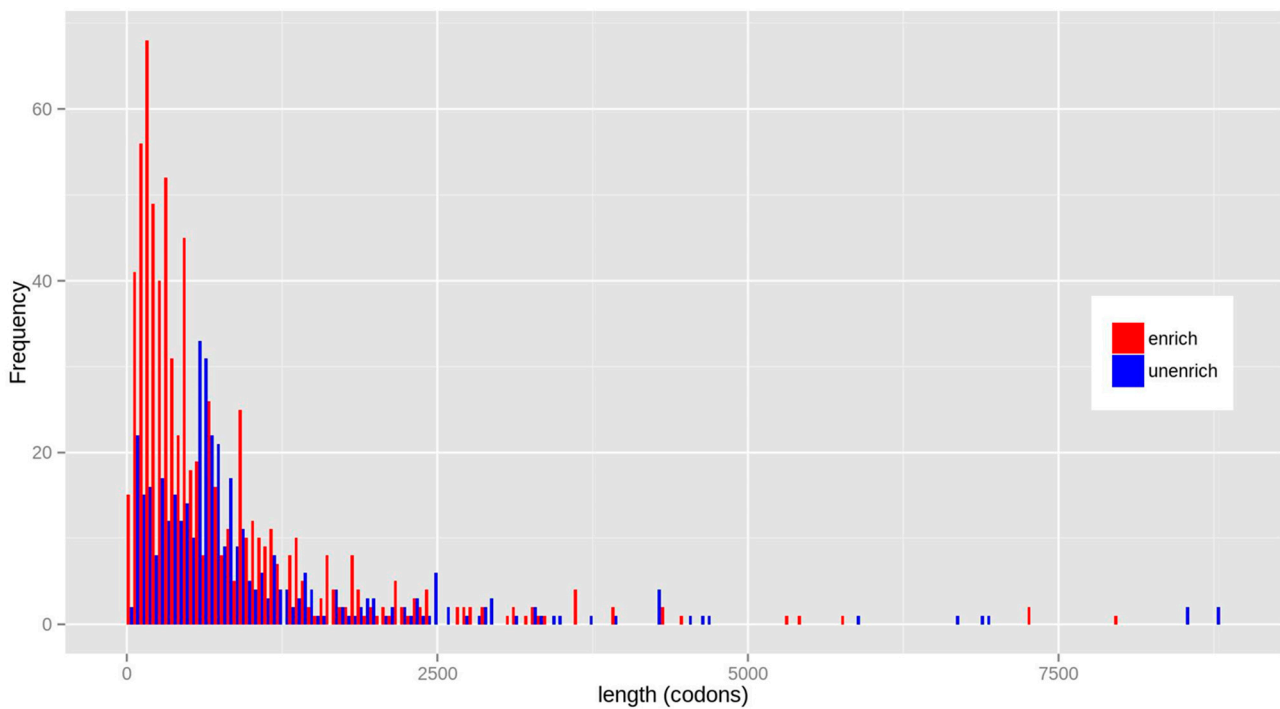

**Figure S2.** Histogram comparing the enriched (red) and the unenriched (blue) outliers from Figure 2a.

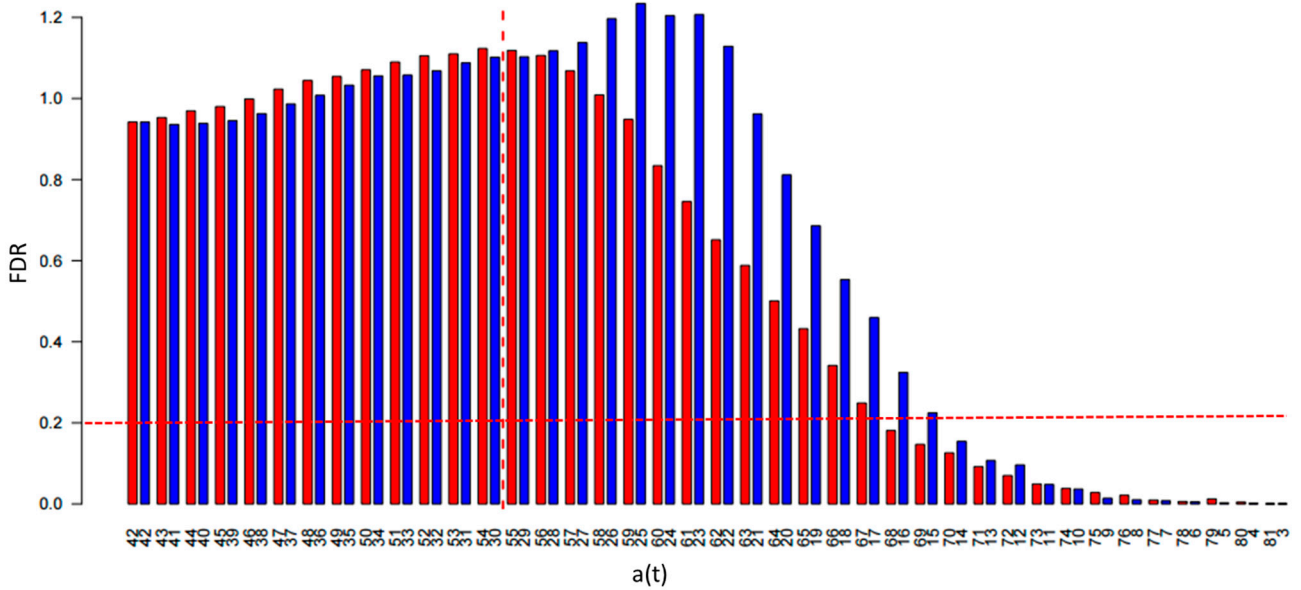

**Figure S3.** Histogram comparing the False Discovery Rate (FDR) symmetry of Figure 2b. Tails of 5% (from the horizontal dashed red line to the right) for enriched windows (red bars) and unenriched windows (blue bars). *ADAT stretches* are considered for those windows with  $FDR < 0.2$  (vertical dashed red line), or equivalently  $a(t) > 67$ .

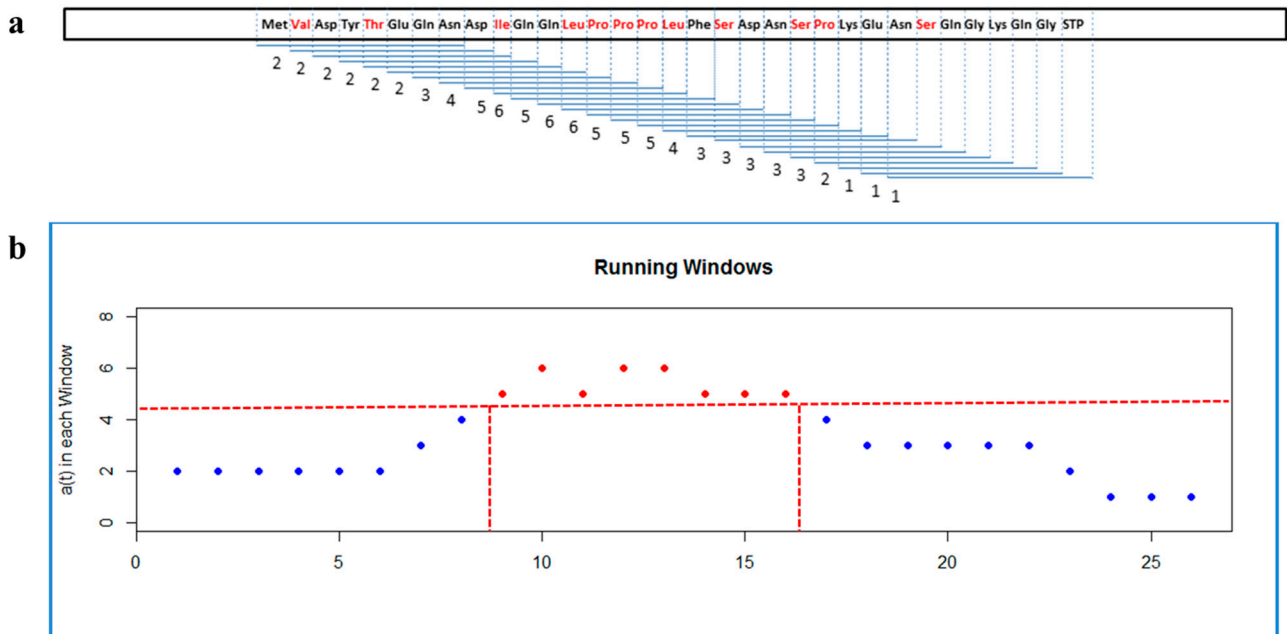

**Figure S4.** *Running-windows* layout (a) Scheme of action for this method. For each sequence the window slides codon by codon from the beginning to the end (dashed blue lines) and  $a(t)$  is calculated; (b) Distribution of  $a(t)$  for each window, the enriched windows correspond to the highest  $a(t)$  values. In this example, there is one single stretch (between horizontal dashed red lines) that consists of eight consecutive enriched windows (red points). Red amino acids correspond to *A codons*.

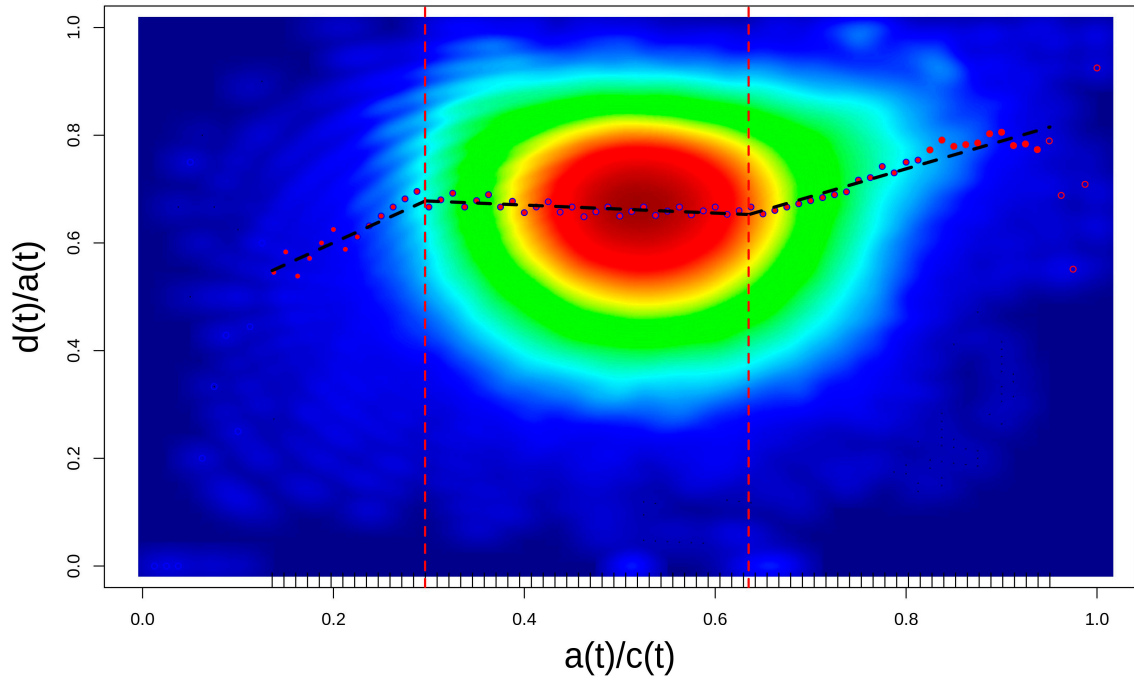

**Figure S5.** Density plot between  $a(t)/c(t)$  and  $d(t)/a(t)$ . The dots correspond to the mean values in Figure 4 and the dashed black lines correspond to a multiple linear regression based on these values. There are two breakpoints at  $a(t)/c(t)$  equal to 0.296 and 0.635 (dashed red lines).

|     |                    |                    |                    |                    |     |                    |                    |                    |                                                               |                    |                    |
|-----|--------------------|--------------------|--------------------|--------------------|-----|--------------------|--------------------|--------------------|---------------------------------------------------------------|--------------------|--------------------|
| Ala | 29                 | 0                  | 9                  | 5                  | Ser | 11                 | 0                  | 4                  | 5                                                             | 0                  | 8                  |
|     | 3'CGI5'<br>5'GCT3' | 3'CGG5'<br>5'GCC3' | 3'CGT5'<br>5'GCA3' | 3'CGC5'<br>5'GCG3' |     | 3'AGI5'<br>5'TCT3' | 3'AGG5'<br>5'TCC3' | 3'AGT5'<br>5'TCA3' | 3'AGC5'<br>5'TCG3'                                            | 3'TCA5'<br>5'AGT3' | 3'TCG5'<br>5'AGC3' |
|     | 1,84               | 2,77               | 1,58               | 0,74               |     | 1,52               | 1,77               | 0,44               | 1,22                                                          | 1,21               | 1,95               |
| Pro | 10                 | 0                  | 4                  | 7                  | Arg | 7                  | 0                  | 4                  | 6                                                             | 5                  | 6                  |
|     | 3'GGI5'<br>5'CCT3' | 3'GGG5'<br>5'CCC3' | 3'GGT5'<br>5'CCA3' | 3'GGC5'<br>5'CCG3' |     | 3'GCI5'<br>5'CGT3' | 3'GCG5'<br>5'CGC3' | 3'GCT5'<br>5'CGA3' | 3'GCC5'<br>5'CGG3'                                            | 3'TCC5'<br>5'AGG3' | 3'TCT5'<br>5'AGA3' |
|     | 1,75               | 1,98               | 0,69               | 1,69               |     | 0,45               | 1,04               | 1,14               | 0,62                                                          | 1,2                | 1,22               |
| Thr | 10                 | 0                  | 6                  | 6                  | Leu | 7                  | 0                  | 4                  | 6                                                             | 5                  | 6                  |
|     | 3'TGI5'<br>5'ACT3' | 3'TGG5'<br>5'ACC3' | 3'TGT5'<br>5'ACA3' | 3'TGC5'<br>5'ACG3' |     | 3'GAI5'<br>5'CTT3' | 3'GAG5'<br>5'CTC3' | 3'GAT5'<br>5'CTA3' | 3'GAC5'<br>5'CTG3'                                            | 3'AAC5'<br>5'TTG3' | 3'AAT5'<br>5'TTA3' |
|     | 1,31               | 1,89               | 0,61               | 1,51               |     | 1,32               | 1,96               | 3,96               | 0,72                                                          | 1,29               | 0,77               |
| Val | 11                 | 0                  | 16                 | 5                  | Ala | 14                 | 3                  | 5                  | tRNA copy number<br>3'anticodon5'<br>5'Codon3'<br>codon usage |                    |                    |
|     | 3'CAI5'<br>5'GTT3' | 3'CAG5'<br>5'GTC3' | 3'CAT5'<br>5'GTA3' | 3'CAC5'<br>5'GTG3' |     | 3'TAI5'<br>5'ATT3' | 3'ATG5'<br>5'ATC3' | 3'CGT5'<br>5'ATA3' |                                                               |                    |                    |
|     | 1,1                | 1,45               | 2,81               | 0,71               |     | 1,6                | 2,08               | 0,75               |                                                               |                    |                    |

**Figure S6.** Codon-anticodon relationships for *ADAT-aa*. tRNA copy number and codon usage is shown for each pair, as indicated in bottom-right legend. Inosine 34 and those nucleotides recognized throughout “wobble” pairing are depicted in pink. Green lines shows which codon-anticodon pairings takes place. Anticodons depicted in red do not exist in human genome.

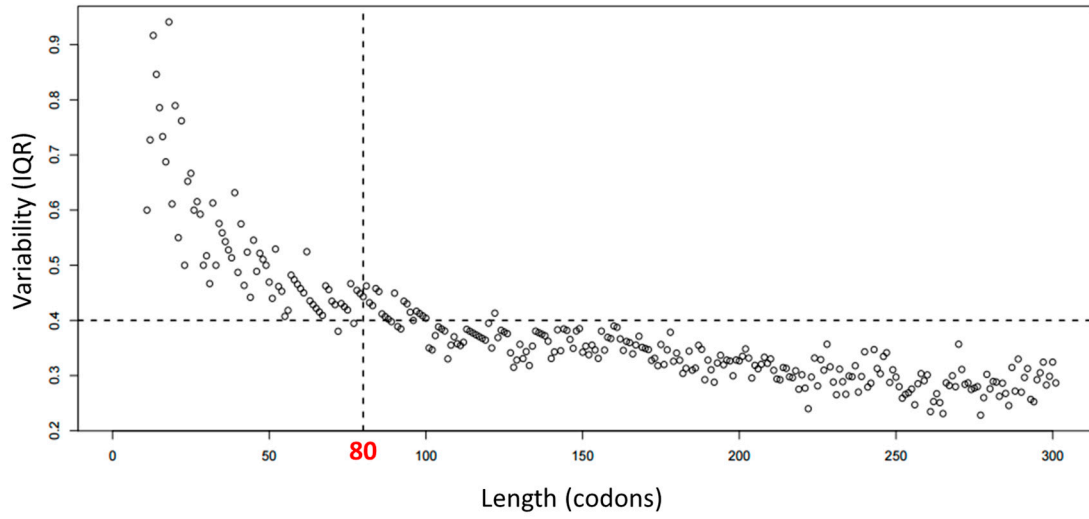

**Figure S7.** Variability corresponding to Figure 2a calculated by Interquartile Range (IQR).

**Table S1.** Data corresponding to Figure 3a–c. *aa*: amino acids, *cod*: codons, *CU*: codon usage, *Str*: ADAT stretches dataset, *All*: Human transcriptome dataset, *fold*: rate Str/All. Each percentage is measured with respect to the total of codons, thus Str and All columns add up to 100%.

| aa  | cod  | CU   |      | fold | aa   | cod  | CU   |      | fold | aa   | cod  | CU   |      | fold |
|-----|------|------|------|------|------|------|------|------|------|------|------|------|------|------|
|     |      | Str  | All  |      |      |      | Str  | All  |      |      |      | Str  | All  |      |
| Thr | aca  | 3.94 | 1.51 | 2.61 | Leu  | cta  | 0.4  | 0.72 | 0.56 | Lys  | aaa  | 0.55 | 2.44 | 0.23 |
|     | acc  | 6.36 | 1.89 | 3.37 |      | ctc  | 1.17 | 1.96 | 0.60 |      | aag  | 0.79 | 3.19 | 0.25 |
|     | acg  | 1.35 | 0.61 | 2.21 |      | ctg  | 2.14 | 3.96 | 0.54 | Asn  | aac  | 0.57 | 1.91 | 0.30 |
|     | act  | 4.09 | 1.31 | 3.12 |      | ctt  | 1.45 | 1.32 | 1.10 |      | aat  | 0.45 | 1.7  | 0.26 |
| Ala | gca  | 2.4  | 1.58 | 1.52 | tta  | 0.5  | 0.77 | 0.65 | Met  | atg  | 0.94 | 2.2  | 0.43 |      |
|     | gcc  | 4.99 | 2.77 | 1.80 | ttg  | 0.79 | 1.29 | 0.61 | Gln  | caa  | 0.35 | 1.23 | 0.28 |      |
|     | gcg  | 1.02 | 0.74 | 1.38 | Val  | gta  | 0.57 | 0.71 |      | 0.80 | cag  | 1.43 | 3.42 | 0.42 |
|     | gct  | 3.32 | 1.84 | 1.80 |      | gtc  | 1.89 | 1.45 | 1.30 | His  | cac  | 0.77 | 1.51 | 0.51 |
| Pro | cca  | 5.45 | 1.69 | 3.22 | gtg  | 2.48 | 2.81 | 0.88 | cat  |      | 0.28 | 1.09 | 0.26 |      |
|     | ccc  | 5.37 | 1.98 | 2.71 | gtt  | 1.15 | 1.1  | 1.05 | Glu  | gaa  | 0.92 | 2.9  | 0.32 |      |
|     | ccg  | 2.23 | 0.69 | 3.23 | Arg  | cga  | 0.48 | 0.62 |      | 0.77 | gag  | 1.25 | 3.96 | 0.32 |
|     | cct  | 6.54 | 1.75 | 3.74 |      | cgc  | 0.95 | 1.04 | 0.91 | Asp  | gac  | 0.83 | 2.51 | 0.33 |
| Ser | tca  | 2.88 | 1.22 | 2.36 | cgg  | 1.01 | 1.14 | 0.89 | gat  |      | 0.33 | 2.18 | 0.15 |      |
|     | tcc  | 4.75 | 1.77 | 2.68 | cgt  | 0.39 | 0.45 | 0.87 | Gly  | gga  | 0.71 | 1.65 | 0.43 |      |
|     | tcg  | 0.97 | 0.44 | 2.20 | aga  | 1.1  | 1.22 | 0.90 |      | ggc  | 1.16 | 2.22 | 0.52 |      |
|     | tct  | 4.03 | 1.52 | 2.65 | agg  | 1.06 | 1.2  | 0.88 |      | ggg  | 0.96 | 1.65 | 0.58 |      |
| agc | 3.46 | 1.95 | 1.77 | ata  | 0.44 | 0.75 | 0.59 | ggt  |      | 0.89 | 1.08 | 0.82 |      |      |
| agt | 1.97 | 1.21 | 1.63 | Ile  | atc  | 1.24 | 2.08 | 0.60 | Tyr  | tac  | 0.35 | 1.53 | 0.23 |      |
|     |      |      |      |      | att  | 0.67 | 1.6  | 0.42 |      | tat  | 0.15 | 1.22 | 0.12 |      |
|     |      |      |      |      |      |      |      |      | Cys  | tgc  | 0.17 | 1.26 | 0.13 |      |
|     |      |      |      |      |      |      |      |      |      | tgt  | 0.1  | 1.06 | 0.09 |      |
|     |      |      |      |      |      |      |      |      | Trp  | tgg  | 0.24 | 1.32 | 0.18 |      |
|     |      |      |      |      |      |      |      |      | Phe  | ttc  | 0.43 | 2.03 | 0.21 |      |
|     |      |      |      |      |      |      |      |      |      | ttt  | 0.38 | 1.76 | 0.22 |      |
|     |      |      |      |      |      |      |      |      | STOP | taa  | 0    | 0.1  | 0.00 |      |
|     |      |      |      |      |      |      |      |      |      | tag  | 0    | 0.08 | 0.00 |      |
|     |      |      |      |      |      |      |      |      |      | tga  | 0    | 0.16 | 0.00 |      |

**Table S2.** Data corresponding to Figure 3d. Same notation as in Table S1. *4box* means that for the amino acids Ser, Leu and Arg, only the 4box XXN codons were taken into account.

|                    | CU    |       |
|--------------------|-------|-------|
|                    | Str   | All   |
| <b>TAPS (4box)</b> | 59.69 | 23.31 |
| <b>LIVR (4box)</b> | 16.43 | 21.71 |

**Table S3.** Data corresponding to Figure 3e. Same notation as in Table S2. *G*: G-ended codon for the corresponding amino acid. %*G*: ratio *G*/*4box*.

| aa  | cod  | CU    |       | aa  | cod  | CU    |       |
|-----|------|-------|-------|-----|------|-------|-------|
|     |      | Str   | All   |     |      | Str   | All   |
| Thr | 4box | 15.74 | 5.32  | Leu | 4box | 5.16  | 7.96  |
|     | G    | 1.35  | 0.61  |     | G    | 2.14  | 3.96  |
|     | %G   | 8.58  | 11.47 |     | %G   | 41.47 | 49.75 |
| Ala | 4box | 11.73 | 6.93  | Val | 4box | 6.09  | 6.07  |
|     | G    | 1.02  | 0.74  |     | G    | 2.48  | 2.81  |
|     | %G   | 8.70  | 10.68 |     | %G   | 40.72 | 46.29 |
| Pro | 4box | 19.59 | 6.11  | Arg | 4box | 2.83  | 3.25  |
|     | G    | 2.23  | 0.69  |     | G    | 1.01  | 1.14  |
|     | %G   | 11.38 | 11.29 |     | %G   | 35.69 | 35.08 |
| Ser | 4box | 12.63 | 4.95  | Ile | 4box | 2.35  | 4.43  |
|     | G    | 0.97  | 0.44  |     | G    | -     | -     |
|     | %G   | 7.68  | 8.89  |     | %G   | -     | -     |
